# Supplementary material
Source: bioRxiv or medRxiv preprint supplement (https://www.biorxiv.org/highwire/filestream/28069/field_highwire_adjunct_files/0/099168-1.pdf)
Supplement: Supplementary file [file 099168-1.pdf]

**Supplementary Table 6**

Counts of responses to pre- and post- questions for University of Cincinnati students about annotation and bioinformatics.

Note: Not all students completed the pre- and post-test resulting on only 22 students that could be assessed.

| No. | Question                                                                          | Pre-test | Post-test |
|-----|-----------------------------------------------------------------------------------|----------|-----------|
| 1   | What are some major difficulties associated with genome sequencing and assembly?  | 11/22    | 22/22     |
| 2   | What information is utilized to predict genes in a newly assembled genome?        | 6/22     | 17/22     |
| 3   | How does a sequenced genome increase tools available for research on an organism? | 8/22     | 20/22     |
